# Supplementary material
Source: PubMed Central journal article supplement (PMC6400277)
Supplement: NIHMS1014324-supplement-1.pdf [file NIHMS1014324-supplement-1.pdf]

**Supplemental Table 1: Multivariate analysis of prognostic variables for Disease-Specific Survival (DSS) unadjusted for tumor characteristics and treatment in patients with kidney cancer who received care with Northern California Kaiser Permanente General from 1998–2008**

| Variable      | Hazard Ratio (HR) | 95% CI    | <i>p</i> value |
|---------------|-------------------|-----------|----------------|
| Age           | 1.03              | 1.02-1.03 | <.0001         |
| Gender        |                   |           | 0.210          |
| Male          | 1.00 (ref)        |           |                |
| Female        | 0.91              | 0.78–1.06 |                |
| Race          |                   |           | 0.704          |
| White         | 1.00 (ref)        |           |                |
| Hispanic      | 0.96              | 0.78–1.18 |                |
| Renal Disease | 1.12              | 0.66–1.88 | 0.677          |
| Diabetes      | 1.12              | 0.76–1.37 | 0.269          |
